# Supplementary material for: Radiomic Features From Multi-Parameter MRI Combined With Clinical Parameters Predict Molecular Subgroups in Patients With Medulloblastoma
Source: Front Oncol. 2020 Oct 2;10:558162. doi: 10.3389/fonc.2020.558162 (PMC7566191; doi:10.3389/fonc.2020.558162)
Supplement: Supplementary file 2 [file Data_Sheet_2.xlsx]

## Sheet: nanostring data
Samples	confidence	subgroup	DKK2	EMX2	GAD1	TNC	WIF1	ATOH1	EYA1	HHIP	PDLIM3	SFRP1	EGFL11	GABRA5	IMPG2	MAB21L2	NPR3	NRL	EOMES	KCNA1	KHDRBS2	OAS1	RBM24	UNC5D
200914178	0.988669	WNT	6.117	13.54	14.29	16.22	8.455	7.239	7.521	4.351	5.936	9.296	7.277	7.702	11.21	9.622	6.936	7.553	9.849	9.106	3.029	7.074	8.315	8.455
200915315	0.999867	WNT	9.381	11.51	13.13	14.72	13.88	6.384	6.619	3.882	4.96	6.327	9.155	6.921	8.946	10.66	6.493	6.643	7.251	6.356	3.712	7.384	7.07	6.545
200916517	0.999929	WNT	11.31	12.67	12.6	15.34	12.97	6.017	6.578	2.696	4.865	7.516	8.389	6.65	11.96	7.503	6.626	7.354	6.187	6.31	3.281	5.281	7.235	6.528
201006923	0.999986	WNT	10.04	11.4	13.72	14.39	14.47	5.28	6.28	2.192	3.777	5.92	6.668	6.099	10.07	10.88	4.893	6	5.28	6	1.777	4.716	4.716	6.075
201118841	0.999923	WNT	12.14	12.79	13.65	15.63	13.23	7.417	8.409	3.949	4.743	7.715	7.642	8.252	10.31	8.387	7.502	8.328	7.943	10.12	4.364	7.55	7.46	7.098
2012-15923	0.999497	WNT	11.8	11.33	12.86	14.85	13.23	7.328	9.17	6.581	4.943	7.993	8.818	8.336	11	8.68	7.297	7.983	8.068	7.488	6.501	7.417	7.656	7.973
2013-04277	0.998793	WNT	8.938	11.88	12.38	15.46	12.24	6.662	7.368	4.486	4.941	7.08	8.324	7.255	9.398	11.85	6.577	7.845	7.65	8.312	6.84	6.96	6.526	7.071
2014-05099	0.994344	WNT	9.426	11.61	12.66	12.37	13.64	5.948	7.118	2.726	4.463	7.35	8.107	7.828	11.19	6.095	7.909	8.445	8.174	6.463	9.692	6.311	8.813	7.841
2014-20089	0.99999	WNT	11.49	12.58	13.17	15.09	13.78	4.431	6.291	5.272	4.56	5.959	6.253	6.3	11.42	10.47	5.071	6.906	6.857	8.288	2.912	5.56	5.497	6.016
2014-23893	0.999964	WNT	12.17	12.43	12.51	14.18	13.69	4.516	5.16	5.604	3.101	5.726	7.561	6.271	12.45	12.9	5.516	7.217	7.362	6.646	2.838	5.604	5.423	7.324
2014-24587	0.97342	WNT	8.038	10.38	8.616	12.39	9.648	5.353	8.291	3.253	3.616	6.201	5.616	6.031	4.146	5.4	5.353	5.4	7.075	4.031	3.616	6	7.713	5.616
2014-68624	0.999953	WNT	11.67	12.33	13.52	14.42	14.34	5.376	7.09	4.318	4.192	8.133	7.976	7.099	10.54	10.42	5.733	6.841	7.355	7.027	7.487	6.333	6.224	5.903
2015-00426	0.999971	WNT	12.25	12.26	12.83	14.44	15.1	5.274	6.224	3.586	4.323	6.525	7.144	7.817	11.1	9.936	6.274	7.335	8.103	7.924	3.876	6.876	6.546	8.376
2015-06369	0.981816	WNT	10.62	10.52	11.19	12.55	13.3	8.208	8.617	3.311	4.142	8.054	9.966	8.625	10.11	11.67	8.633	8.346	8.91	8.024	6.551	7.771	8.301	8.142
2015-13872	0.992796	WNT	8.018	11.42	12.24	14.37	12.49	8.317	7.124	5.317	6.317	9.175	8.487	7.777	10.49	11.89	7.487	7.902	6.902	7.777	5.902	5.317	7.124	9.271
2015-43894	0.999994	WNT	12.93	12.42	13.34	15.98	14.32	5.634	6.563	4.888	5.143	6.163	9.731	6.922	12.14	9.109	5.715	7.021	6.578	7.21	2.256	6.829	5.978	6.326
2015-52749	0.999918	WNT	12.24	12.63	13.62	15	13.92	6.04	7.072	5.43	4.455	7.056	8.233	7.404	12.23	12.03	6.297	7.625	7.269	7.597	7.498	6.863	6.325	6.98
2015-69304	0.986908	WNT	10.43	11.34	12.9	15.56	12.77	6.255	7.577	6.763	4.892	8.385	9.849	7.449	8.754	6.449	6.407	7.504	12.95	12.43	10.97	7.146	10.81	11.72
2015-72925	0.999837	WNT	10.34	11.25	12.8	15.55	12.7	5.703	7.626	6.506	5.634	10.59	6.486	7.984	8.208	5.184	5.816	6.97	7.974	11.51	3.921	6.785	7.457	7.018
2016-52937	0.996242	WNT	9.473	11.5	12.45	12.11	13.64	5.829	6.045	2.875	3.334	7.223	7.54	7.113	11.24	5.708	7.497	8.241	7.994	5.962	9.744	5.63	8.748	7.829
2016-64533	0.999993	WNT	12.82	12.66	13.34	14.54	15.2	5.253	6.687	4.844	4.308	7.517	6.454	6.659	12.73	9.39	5.767	7.714	7.89	9.278	3.234	6.271	6.262	6.51
2016-81403	0.999946	WNT	13.08	12.63	13.49	15.24	15.21	6.984	8.93	4.925	5.51	8.816	8.732	8.692	10.95	10.45	7.294	8.05	8.668	9.497	6.148	7.955	8.263	7.8
2017-04996	0.999977	WNT	13.05	12.26	12.9	15.18	13.06	4.793	5.793	5.215	4.62	5.724	6.853	6.342	11.91	10.88	5.132	7.83	6.405	7.142	6.508	6.11	5.525	6.031
2017-08647	0.999955	WNT	13.12	11.72	12.96	13.41	13.66	4.935	4.397	2.25	3.691	5.613	8.371	6.028	11.07	12.41	5.058	6.157	4.997	4.902	7.818	6.288	4.443	6.211
2017-13022	0.999999	WNT	13.38	12.88	14.24	15.67	15.81	6.026	7.178	6.584	6.178	7.205	6.485	7.222	6.456	6.611	5.787	7.695	7.463	9.092	4.81	7.036	6.542	7.026
2017-30872	0.999407	WNT	12.3	12.15	13.5	14.93	13.56	8.281	7.374	6.696	6.696	9.018	9.959	8.374	11.62	11.09	8.462	7.374	7.544	6.374	7.374	6.374	6.959	9.898
2017-74726	0.999966	WNT	10.18	12.03	13.65	15.52	14.72	6.497	7.264	2.27	4.463	6.873	8.125	7.388	10.95	6.244	6.244	7.34	7.34	7.762	4.218	7.327	6.508	6.518
2018-21021	0.99995	WNT	9.425	11.28	12.65	14.39	13.47	4.616	6.901	4.371	4.991	6.309	5.835	5.436	6.84	8.249	4.397	5.581	5.33	6.671	3.703	5.692	6.288	5.649
200915396	0.993834	SHH	8.132	7.324	8.389	7.187	7.772	11.34	11.5	11.15	6.819	13.68	7.62	7.952	6.187	8.579	7.324	8.341	7.748	7.842	3.45	7.909	7.357	8.015
201001517	0.999957	SHH	4.769	5.606	5.049	6.577	6.517	11.16	12.62	12.63	6.916	13.59	6.795	5.354	6.454	6.049	6.049	5.916	4.962	3.547	2.962	5.869	4.132	8.697
200903299	0.999519	SHH	3.997	3.845	8.198	9.564	2.997	9.542	9.638	9.585	5.923	10.63	5.582	5.198	5.997	3.482	4.482	4.582	7.319	5.482	3.997	4.675	4.375	5.845
200912133	0.998414	SHH	3.562	2.24	7.78	7.022	3.41	4.633	4.995	10.76	7.274	9.875	4.147	5.24	4.825	4.764	4.941	4.147	4.41	3.24	5.285	3.941	4.488	5.633
200915399	0.872894	SHH	7.231	6.589	8.343	7.646	7.36	9.343	10.15	9.152	6.868	11.14	7.618	8.004	5.53	8.426	7.55	7.803	8.372	9.078	6.469	6.852	7.636	7.047
201112224	0.999905	SHH	4.436	5.349	4.597	7.615	4.872	10.82	11.68	12.11	5.436	12.91	5.706	5.634	6.963	5.104	5.349	4.256	4.597	3.519	6.326	4.597	4.671	6.903
2012-25435	0.925268	SHH	5.819	5.578	4.441	4.993	5.534	5.622	5.704	12.25	7.089	6.643	5.441	7.453	4.926	5.534	6.367	6.235	5.578	4.534	5.488	6.417	11.14	5.178
2012-39338	0.998983	SHH	7.817	4.358	5.224	12.08	4.27	9.537	10.21	11.85	5.762	11.76	8.551	4.971	6.077	5.224	5.696	5.696	5.177	3.592	5.855	5.794	6.809	5.914
2012-50240	0.969132	SHH	4.183	8.046	5.93	8.966	3.598	6.42	5.846	4.25	2.598	9.39	4.113	4.039	4.314	4.039	4.623	5.572	3.878	1.961	2.491	5.094	9.9	5.649
2013-00898	0.999459	SHH	5.841	5.71	5.566	8.921	5.34	9.089	12.02	9.602	6.684	13.25	5.34	6.405	5.488	7.278	6.046	6.478	5.71	5.468	4.933	6.004	6.018	5.318
2013-18469	0.998689	SHH	6.846	6.403	7.081	8.359	8.151	10.37	13.25	11.59	4.846	12.16	6.736	7.267	6.929	6.553	6.044	6.988	6.759	5.487	4.617	6.202	6.629	6.151
2013-22765	0.999737	SHH	9.937	5.493	5.39	7.701	5.723	9.787	12.26	11.51	8.487	13.1	6.027	6.518	5.957	6.127	5.845	6.566	6.744	5.095	3.805	7.566	7.078	6.92
2013-34302	0.999847	SHH	6.498	5.527	5.883	8.562	9.187	10.98	12.06	12.57	5.927	13.54	6.092	5.205	7.905	5.468	5.97	5.97	4.79	3.69	4.97	4.583	5.342	7.437
2013-37851	0.99334	SHH	7.626	7.186	6.982	8.098	7.213	10.84	11.71	10.73	5.904	13.74	7.472	7.782	7.354	7.098	7.034	6.795	6.83	6.4	6.167	6.935	7.765	6.445
2013-54187	0.999987	SHH	5.891	5.238	4.891	8.015	6.084	10.22	12.29	11.98	6.221	13.32	4.784	5.029	5.922	4.517	4.01	5.849	4.347	2.221	2.932	5.12	4.716	7.907
2014-00398	0.999995	SHH	7.546	3.913	4.88	9.384	4.846	10.9	13.48	12.01	6.53	12.88	4.623	4.261	6.701	3.977	4.311	6.208	4.36	1.775	2.453	7.588	4.261	5.811
2014-12653	0.991317	SHH	7.319	7.388	6.955	6.973	6.9	10.18	11.94	10.27	5.54	12.37	7.655	8.034	6.125	7.277	6.955	7.025	6.72	6.277	5.092	6.9	7.71	6.587
2014-16849	0.996731	SHH	6.007	5.881	7.509	6.329	5.966	11.29	11.47	10.05	6.391	12.98	7.618	6.881	6.007	10.37	6.881	6.814	6.085	6.791	4.296	5.881	6.719	6.391
2014-55696	0.982451	SHH	7.938	6.97	9.976	7.223	7.539	9.843	11.79	11.76	5.138	13.54	7.921	7.684	6.954	7.353	7.223	7.365	7.377	7.034	5.539	7.034	9.531	8.167
2014-61982	0.999887	SHH	4.527	2.762	8.637	7.574	2.247	10.03	10.26	8.728	5.055	11.09	4.61	4.569	5.932	4.247	4.484	4.832	3.61	3.025	2.762	4.899	5.247	6.417
2014-70040	0.985304	SHH	7.185	7.349	7.899	10.5	7.296	10.21	12.2	12	5.764	12.42	7.526	8.287	6.887	9.017	7.126	8.033	7.738	5.911	5.814	7.166	7.777	6.887
2015-25033	0.906341	SHH	8.567	8.461	8.683	9.143	8.441	10.14	11.56	11.88	6.648	13.27	8.876	9.039	6.683	7.963	8.357	8.357	8.97	8.136	6.683	8.111	8.822	8.42
2015-33728	0.999653	SHH	6.082	5.082	7.848	7.746	5.675	9.187	11.24	12.43	6.279	13.12	6.444	6.093	5.66	5.21	5.979	6.568	5.774	4.417	5.854	5.893	6.179	6.06
2015-47773	0.99221	SHH	7.348	7.416	7.438	7.836	7.67	10.32	11.81	11.46	6.563	12.85	7.963	7.811	7.008	6.008	7.094	7.008	7.348	7.08	5.438	7.214	7.359	7.794
2016-16397	0.999559	SHH	8.665	4.369	9.474	9.343	5.468	9.524	11.53	10.15	4.649	12.01	4.146	4.262	5.731	4.649	3.369	4.561	7.004	8.606	4.369	5.468	5.419	6.176
2016-61162	0.962026	SHH	6.703	5.452	5.559	9.155	6.166	8.377	10.3	8.723	5.368	11.98	6.761	6.856	5.642	4.96	5.72	6.07	6.931	9.947	7.338	6.501	6.992	6.728
2016-67233	0.988401	SHH	8.135	8.548	8.413	7.401	8.177	9.932	12.25	11.03	7.82	14.09	8.336	8.463	5.784	7.071	7.432	7.559	8.545	7.538	6.051	7.934	8.315	7.293
2016-71175	0.999159	SHH	6.344	6.428	6.788	10.89	6.678	9.804	12.23	11.73	6.7	12.74	6.631	6.482	5.986	7.27	6.058	6.631	7.004	4.788	5.745	5.788	5.986	6.745
2017-05980	0.940278	SHH	7.788	7.564	8.037	8.331	7.824	9.47	10.65	9.521	8.027	11.87	7.925	8.211	5.292	10.12	6.65	7.199	8.116	7.217	7.764	7.82	7.78	6.641
2017-15465	0.736167	SHH	5.137	6.137	10.54	8.385	6.722	9.459	10.08	9.204	5.459	11.9	7.044	7.225	6.307	7.307	7.459	6.722	9.53	11.34	7.661	6.459	7.137	8.838
2017-36363	0.998952	SHH	6.301	5.938	4.881	8.127	5.694	10.65	7.861	11.19	5.694	13.6	6.011	6.614	6.179	5.694	5.163	6.851	6.114	4.372	4.195	6.358	6.479	6.386
2018-15899	0.999682	SHH	4.982	4.308	6.924	9.11	3.454	9.788	10.99	10.5	5.522	12.4	4.561	5.163	6.612	4.903	4.482	5.612	5.229	4.943	6.129	5.495	5.893	6.301
2018-19774	0.998513	SHH	5.41	5.132	4.98	6.838	4.668	8.641	9.416	9.928	2.898	11.12	5.44	6.318	5.764	5.483	4.425	5.44	5.483	4.168	4.202	4.643	6.105	5.578
200908663	0.937743	Group4	6.612	6.525	6.984	6.525	6.984	7.81	7.695	4.11	5.525	9.064	9.211	7.81	7.383	12.03	7.917	6.525	14.83	11.96	10.98	6.847	11	11.18
200908766	0.887679	Group4	7.43	6.26	7.43	7.582	5.845	8.068	7.26	4.26	5.845	8.845	9.26	8.961	6.582	9.215	8.845	8.508	15.02	9.015	12.14	7.068	11.9	11.27
201022630	0.904949	Group4	5.625	4.777	5.625	5.777	5.263	6.625	5.263	5.263	5.455	8.433	9.987	8.183	10.2	7.882	7.04	8.645	14.87	12.09	10.76	5.455	10.67	12.2
201106476	0.900173	Group4	9.246	9.539	9.192	8.672	9.071	9.303	10.25	4.486	4.623	10.3	10.31	9.752	6.164	9.373	9.267	9.393	14.46	13.17	11.74	9.277	11.99	11.65
200909555	0.956943	Group4	6.929	6.874	3.174	7.344	5.174	6.261	6.759	5.174	4.174	10	8.744	8.788	6.981	8.174	7.128	6.981	14.55	12.61	10.36	7.6	11.3	10.88
200914755	0.987645	Group4	4.249	5.834	9.015	5.628	6.682	5.834	5.512	4.512	6.175	9.146	9.24	6.785	6.097	5.834	5.628	5.628	13.54	11.58	9.362	6.972	10.99	9.904
201121587	0.969891	Group4	7.691	7.691	7.428	7.394	7.148	8.376	8.851	4.188	3.603	9.163	9.637	8.238	5.876	8.813	7.285	7.618	14.58	12.2	12.18	7.526	11.35	12.29
2012-12151	0.84064	Group4	5.443	5.443	6.739	7.113	5.891	5.721	5.858	4.099	2.399	8.518	10.07	6.825	11.69	6.353	6.257	10.8	14.69	11.45	11.13	6.486	9.833	12.06
2012-23340	0.920432	Group4	5.727	5.412	5.007	7.007	5.505	5.802	6.474	5.753	2.92	7.827	9.301	6.427	9.127	8.637	6.09	7.527	13.43	9.949	11.36	5.701	11.43	11.29
2013-06889	0.837938	Group4	9.008	8.793	8.622	8.291	8.982	8.564	9.986	4.633	3.955	9.149	10.92	9.715	7.306	9.059	8.576	8.937	13.72	13.23	9.633	9.211	11.36	12.04
2013-13884	0.864365	Group4	5.8	6.097	5.315	6.426	5.194	6.554	7.8	4.758	2.993	7.602	11.62	8.742	8.114	6.88	6.028	6.919	14.01	10.59	10.44	4.758	10.14	11.5
2013-16351	0.896802	Group4	4.802	3.851	7.192	5.23	3.266	4.266	5.114	2.752	3.266	8.854	10.26	8.391	10.75	5.154	4.699	9.225	13.62	9.485	11.14	4.802	10.23	12
2013-42707	0.936725	Group4	7.345	7.304	7.345	7.332	7.57	6.558	8.013	4.411	2.189	8.398	8.759	7.898	8.871	7.218	7.359	8.43	14.67	10.14	13.48	7.57	11.36	12.5
2013-52659	0.866835	Group4	7.856	7.303	7.622	8.123	7.271	7.292	8.575	4.728	3.526	8.801	9.765	8.399	9.83	7.841	7.123	8.216	14.54	9.61	12.56	7.499	11.11	12.46
2014-00200	0.77898	Group4	8.211	7.328	7.503	7.749	8.008	6.672	7.714	7.164	1.789	7.924	9.517	8.236	8.942	7.065	7.397	8.305	13.32	9.058	11.58	7.784	10.89	11.26
2014-04996	0.875381	Group4	5.029	4.427	5.749	6.642	4.789	4.789	5.334	2.526	1.205	7.05	11.18	10.51	6.544	5.707	5.388	5.819	12.27	8.625	9.929	6.256	10.56	10.25
2014-05791	0.97315	Group4	3.783	4.783	7.024	6.494	4.412	5.024	5.646	4.572	3.783	7.131	8.695	7.231	8.953	5.572	5.182	4.909	14.52	11.1	10.14	5.079	10.13	11.58
2014-08383	0.930216	Group4	6.933	6.085	5.445	7.397	6.724	6.949	7.559	4.27	3.215	8.805	9.357	7.341	7.038	7.818	5.974	7.714	13.73	10.84	11.4	7.1	10.31	9.505
2014-12577	0.991161	Group4	5.058	5.522	2.785	6.954	4.106	5.287	6.369	3.785	3.007	8.177	9.685	6.691	7.961	6.154	4.9	7.222	14.41	13.15	11.41	7.769	11.66	12.84
2014-18620	0.81884	Group4	6.726	6.341	5.695	7.054	7.4	6.598	7.078	2.756	3.756	8.598	11.83	8.801	6.786	6.457	6.844	7.259	7.194	11.33	12.46	7.726	9.285	10.22
2014-31470	0.819982	Group4	7.014	6.632	6.073	8.091	6.707	6.147	6.954	3.825	3.41	7.332	11.63	8.147	9.813	8.014	6.632	8.539	13.7	12.11	11.02	7.836	9.883	11.6
2014-40130	0.984908	Group4	4.359	3.774	3.996	5.861	5.581	2.774	4.359	2.189	1.189	6.875	11.32	6.339	6.728	6.983	3.648	4.833	13.69	9.919	10.96	5.398	10.67	10.25
2014-43847	0.816709	Group4	3.721	5.001	6.879	6.373	4.557	3.82	4.498	6.528	3.083	7.46	11.33	5.913	10.49	4.498	5.468	9.36	13.49	11.59	6.083	4.614	9.55	11.17
2015-26259	0.977817	Group4	6.755	6.885	7.116	6.979	6.885	6.185	7.586	3.992	4.185	7.661	7.843	7.251	6.885	6.785	6.314	7.47	14.05	13.17	11.54	7.043	10.69	10.75
2015-33604	0.802302	Group4	7.46	7.651	7.346	7.493	7.498	6.617	7.546	4.182	2.234	8.343	11.27	8	8.063	6.587	7.056	8.175	13.28	9.344	11.25	8.012	10.11	10.39
2015-37411	0.874822	Group4	7.617	7.29	7.072	8.284	7.523	7.743	9.477	7.545	0.4573	10.49	10.68	8.485	7.087	6.779	7.388	7.647	13.86	10.49	11.65	8.123	11.35	10.22
2015-42777	0.573509	Group4	8.647	8.497	8.184	8.088	8.244	8.321	9.442	2.639	3.376	8.887	11.97	9.283	9.451	8.9	8.274	8.698	12.5	10.88	11.61	8.331	9.803	11.11
2015-46065	0.903625	Group4	6.69	5.976	5.032	6.502	5.58	6.087	7.724	3.654	3.917	9.456	10.26	7.672	7.902	5.976	6.419	7.113	7.636	11.27	10.83	5.791	10.75	11.67
2015-57732	0.6403	Group4	7.134	7.759	7.092	8.174	6.644	8.01	8.649	7.035	3.865	8.783	7.82	8.472	6.874	6.134	6.781	7.05	11.42	8.483	8.974	6.841	8.668	9.4
2015-65185	0.872134	Group4	8.188	8.171	7.636	8.607	8.1	7.112	8.657	4.948	3.363	8.479	9.777	8.484	9.555	7.171	7.786	8.46	14.31	11.66	11.96	7.908	10.9	12.36
2016-08992	0.883166	Group4	5.733	5.105	5.231	7.286	5.931	4.401	5.634	3.504	2.346	7.456	9.119	7.047	7.15	12.98	5.994	6.223	13.1	9.171	10.69	6.367	10.98	9.344
2016-12607	0.986818	Group4	6.943	6.826	6.196	7.425	6.803	5.71	7.125	5.125	3.125	8.411	10.97	6.71	6.973	6.504	6.161	7.271	14.55	13.48	11.67	7.636	11.68	12.15
2016-15981	0.883376	Group4	8.143	7.648	7.091	7.568	8.081	6.305	7.434	4.07	4.07	7.977	9.661	8.79	9.771	6.902	7.278	8.296	14.58	10.46	12.38	8.541	10.42	12.33
2016-18088	0.923713	Group4	3.058	5.306	7.267	5.758	4.643	4.643	4.058	4.38	3.643	5.702	9.311	8.589	6.612	8.989	4.228	5.702	13.16	11.6	8.765	4.058	10.04	8.658
2016-18292	0.926943	Group4	7.917	7.635	8.229	7.517	7.917	7.795	8.338	4.547	2.963	8.112	8.757	8.338	6.21	8.191	7.869	7.82	14.24	12.17	12.04	7.547	10.86	9.814
2016-20354	0.792706	Group4	7.181	7.639	7.327	8.687	6.567	5.997	8.753	5.596	5.04	9.714	11.5	8.256	6.734	6.537	8.345	7.061	12.3	6.734	12.48	7.345	10.85	11.19
2016-40675	0.846852	Group4	7.24	7.23	7.569	7.443	6.862	6.221	7.349	4.992	4.162	8.105	9.329	8.157	10.8	6.141	6.773	9.443	14.16	10.37	11.5	7.201	10.94	12.16
2016-70776	0.818298	Group4	9.068	8.552	8.054	8.464	8.672	7.672	9.289	3.948	4.363	9.035	13.66	9.261	9.529	7.8	8.519	9.016	14.27	11.91	11.22	9.126	12.03	13.05
2016-71337	0.748615	Group4	9.333	8.595	8.515	8.416	8.974	7.816	10.12	4.116	4.253	10	10.96	9.852	8.31	7.871	8.416	9.31	13.65	10.43	11.34	9.098	11.26	11.5
2016-83330	0.70213	Group4	7.791	7.25	6.608	7.094	7.959	5.919	9.017	2.549	2.549	8.003	11.17	7.883	7.791	7.094	5.391	7.331	7.964	10.5	10.16	7.791	8.981	9.009
2017-21833	0.971495	Group4	6.215	5.385	6.303	7.122	6.97	6.463	7.537	5.022	5.022	8.902	8.259	7.573	8.405	7.122	6.303	6.675	14.76	10.31	12.17	5.916	11.39	11.96
2017-40346	0.991515	Group4	5.629	5.262	5.107	6.685	4.908	5.343	7.153	5.107	3.96	7.854	9.476	8.321	7.497	5.999	4.677	6.153	14.43	12.74	12.1	7.833	11.64	12.98
200908443	0.995786	Group3	5.333	10.9	5.44	7.49	4.954	5.72	5.539	3.954	4.633	6.44	12.89	10.32	11.04	8.852	8.563	8.333	7.741	4.44	6.44	4.217	5.333	7.247
200912593	0.950658	Group3	8.765	6.738	5.648	9.213	9.217	5.903	8.903	5.979	3.501	6.248	11.2	10.07	10.91	7.422	7.338	8.442	5.449	7.279	9.252	5.501	6.422	7.323
200913013	0.990275	Group3	5.717	6.203	8.096	9.19	6.254	7.068	7.15	3.717	5.483	8.634	12.88	12.25	11.39	13.41	8.69	9.032	6.855	6.919	7.326	6.717	8.942	8.082
200924946	0.991379	Group3	7.791	9.166	7.503	7.993	7.791	7.87	8.917	3.469	2.054	7.376	12.67	10.76	13.25	9.599	9.713	11.49	11.43	9.318	5.896	6.929	8.327	7.458
200924954	0.93131	Group3	8.301	9.498	8.671	10.11	8.569	8.201	9.257	4.058	3.473	8.569	12.22	9.349	10.83	13.23	8.619	9.432	12.3	8.356	8.748	8.25	8.663	8.873
201002563	0.950553	Group3	7.787	9.351	8.132	9.979	7.93	8.217	9.12	4.617	3.617	8.511	12.35	9.278	11.07	13.49	8.018	9.1	12.63	7.511	8.761	7.358	8.411	8.303
201015062	0.988628	Group3	7.211	10.22	7.733	8.706	7.715	7.733	8.528	4.015	3.43	7.678	13.09	10.66	11.86	13.7	9.395	10.16	11.72	7.715	7.953	8.03	8.185	7.953
201028681	0.964785	Group3	9.527	9.765	9.823	9.009	9.564	10.01	10.5	2.965	4.287	9.391	13.06	10.24	13.2	15.23	9.791	10.52	10.21	9.357	11.89	9.203	9.948	9.651
201030731	0.983255	Group3	6.723	8.299	7.584	6.924	6.965	7.746	8.331	9.857	3.138	9.186	12.46	8.267	14.03	10.72	6.723	8.908	7.225	5.516	5.77	6.597	7.86	6.723
201101139	0.957764	Group3	7.739	8.905	7.695	8.138	7.739	9.026	10.53	5.017	3.695	10.85	12.92	12.2	7.649	14.56	12.1	8.528	10.54	9.86	8.761	7.339	9.211	9.661
201102085	0.967442	Group3	10.05	9.151	9.901	9.648	9.754	9.557	10.93	5.527	4.942	9.723	14.6	11.47	13.5	11.59	9.702	10.63	10.21	9.08	11.52	9.307	10.41	10.1
201102961	0.95831	Group3	9.357	11.85	9.882	8.59	9.265	9.524	10.83	5.846	4.846	9.238	13.16	12.14	9.455	12.95	12.1	9.546	12.75	9.704	9.95	9.063	9.653	9.753
201115885	0.763083	Group3	9.448	9.194	9.012	8.803	9.382	8.511	9.563	3.585	3.585	9.158	12.33	9.719	11.16	8.771	9.2	9.612	12.43	9.377	10.49	9.356	10.4	10.09
201118694	0.953859	Group3	8.691	8.739	8.39	7.893	8.482	8.457	9.541	2.998	0.9978	8.893	13.14	9.656	13.61	14.08	8.583	11.97	13.12	8.265	11.97	8.178	10.15	10.04
201014479	0.996895	Group3	2.478	5.122	4.938	7.717	3.063	3.648	4.97	2.648	2.648	3.726	11.46	9.955	11.98	3.726	8.605	9.527	9.778	3.286	7.286	3.871	4.179	5.093
201018986	0.970818	Group3	7.6	9.071	7.759	7.871	7.752	7.608	8.477	6.845	3.623	7.703	12.33	11.27	11.42	14.01	7.839	10.2	11.75	8.323	10.73	7.305	8.464	8.772
201101875	0.973263	Group3	6.847	6.04	7.362	6.362	6.847	8.04	7.625	4.04	5.625	9.084	11.52	12.03	10.91	10.65	8.288	6.04	6.362	6.625	5.625	6.04	7.04	9.249
201120574	0.999215	Group3	3.501	3.238	3.164	7.215	2.616	4.125	6.066	2.238	1.723	4.44	14.11	12.74	13.9	11.05	8.361	13.01	8.974	3.164	11.04	3.87	5.749	8.889
2012-07327	0.859407	Group3	6.662	6.842	7.598	9.032	7.716	7.48	7.398	2.687	0	7.367	12.18	8.641	12.42	8.344	7.522	9.526	7.828	8.884	10.75	6.594	8.971	11.44
2012-11790	0.857979	Group3	8.075	7.935	7.174	7.681	8.134	7.032	8.431	1.759	2.981	8.256	12.62	8.895	12.61	7.496	7.759	9.966	7.975	8.013	11.54	7.617	8.945	11.11
2012-22400	0.997668	Group3	6.426	5.048	5.999	7.961	4.533	6.516	6.55	3.948	3.463	6.533	12.78	9.783	13.99	9.979	10.44	12.96	8.964	4.726	10.05	5.974	6.095	9.422
2012-23014	0.97819	Group3	6.157	6.136	6.721	7.623	5.179	5.301	7.301	4.091	2.091	6.431	12.41	10.27	12.54	6.358	10.17	9.083	12.36	5.646	10.69	5.551	6.846	9.094
2012-32432	0.975033	Group3	6.616	6.294	7.818	8.589	6.754	6.504	7.464	4.464	4.464	7.464	12.36	11.13	11.9	7.36	10.61	8.841	7.652	6.721	11.8	6.58	8.887	8.434
2012-35177	0.993336	Group3	5.449	5.034	6.835	7.088	5.718	5.944	6.731	4.382	2.312	6.784	12.78	12.72	13.34	7.056	7.034	9.783	7.962	5.16	11.25	4.797	6.416	7.552
2012-36353	0.966022	Group3	7.603	8.809	6.193	7.678	7.49	7.041	9.473	3.386	2.064	8.579	12.85	11.67	6.018	12.96	10.41	8.421	10.89	7.7	5.819	7.331	7.858	8.535
2012-46640	0.937598	Group3	3.38	3.965	4.287	7.57	4.081	4.287	5.468	4.772	2.38	6.806	12.49	12.39	12.3	8.244	9.29	7.369	14.32	6.187	10.71	3.839	7.323	11.96
2012-51640	0.991695	Group3	4.904	4.667	4.947	8.402	3.181	5.414	7.19	3.029	4.181	6.601	14.26	11.6	12.98	7.31	8.868	11.75	5.587	8.854	11.14	5.667	6.904	9.431
2012-55484	0.780142	Group3	10.32	11.04	11.11	10.04	10.95	10.51	10.99	4.569	5.891	10.58	11.4	11.46	9.995	11.59	11.08	11.32	11.28	11.18	11.38	11.18	11.4	11.25
2013-03355	0.871507	Group3	8.827	8.517	8.278	8.273	8.303	7.563	8.667	1.079	2.664	7.793	12.08	11.54	12.13	7.355	7.892	9.708	8.937	10.08	11.23	8.396	9.336	9.921
2013-11956	0.990151	Group3	6.144	5.777	5.483	8.679	5.887	5.699	6.595	6.436	3.989	6.46	11.97	7.297	15.21	6.23	5.921	8.632	5.887	4.851	8.216	5.114	5.483	6.173
2013-22375	0.821586	Group3	6.755	5.746	5.527	8.384	6.763	6.131	7.631	3.507	2.922	7.845	13.53	11.5	12.26	7.262	8.154	8.606	12.75	8.876	12.81	6.821	9.485	10
2013-39387	0.736421	Group3	7.492	6.056	6.219	7.982	6.672	6.149	7.389	1.412	2.997	7.527	9.682	7.716	11.02	14.46	6.319	9.702	10.34	10.13	10.99	7.21	8.572	8.787
2013-43645	0.914073	Group3	6.234	6.13	6.056	6.714	6.036	5.852	6.967	2.615	2.13	6.726	12.05	11.22	12.43	6.377	6.48	10.89	11.07	6.589	11.01	5.874	8.965	9.875
2013-46644	0.836138	Group3	6.445	7.363	6.087	7.213	6.61	6.107	7.429	3.259	3.259	8.581	12.42	8.199	13	15.47	6.445	11.54	12.29	8.372	11.89	6.868	9.868	11.48
2014-00198	0.977344	Group3	2.992	4.214	5.107	9.451	3.992	5.655	7.314	3.729	3.729	5.729	11.68	9.451	12.17	11.31	8.969	6.107	12.62	5.107	11.4	2.992	5.655	8.462
2014-01936	0.837196	Group3	4.685	5.27	7.028	6.27	2.463	4.878	4.463	4.785	2.878	8.078	11.19	6.965	11.6	12.43	5.27	7.522	9.249	7.386	8.536	3.878	7.867	8.564
2014-29799	0.9783	Group3	5.739	4.953	4.85	5.768	5.555	5.14	5.978	2.68	2.417	5.587	12.98	12.96	13.06	6.68	9.605	8.595	11.71	7.265	11.91	5.587	6.265	9.429
2014-30957	0.99619	Group3	4.838	5.165	4.657	7.492	5.023	4.75	6.315	1.973	2.335	6.907	12.57	11.64	10.5	13.27	9.144	7.072	5.432	5.432	6.284	4.92	6.143	7.455
2014-33717	0.998366	Group3	3.804	5.891	5.263	5.389	4.389	5.711	4.804	3.804	3.389	6.611	13.45	12.82	13.8	9.815	7.87	11.96	7.994	5.126	11.05	4.126	5.126	7.419
2014-51783	0.998956	Group3	4.123	4.346	3.654	7.201	4.413	4.597	6.257	1.539	2.275	5.163	13.84	12.78	14.05	11.1	8.52	12.96	9.514	3.539	11.11	4.539	5.568	9.044
2014-54680	0.975029	Group3	6.727	11.95	6.456	9.993	6.435	6.778	7.358	6.539	4.069	6.812	11.91	8.493	11.72	13.57	11.1	7.189	10.86	8.574	11.64	6.124	8.472	7.413
2014-64703	0.92106	Group3	7.778	7.532	7.576	7.633	7.272	8.993	8.555	4.517	3.254	8.91	12.59	10.5	12.52	9.308	8.863	11.15	11.16	9.185	10.04	7.041	9.999	10.6
2015-03189	0.997867	Group3	6.085	5.464	4.571	8.903	6.121	5.348	5.933	3.223	1.763	6.011	13.35	11.99	13.21	12.98	8.134	10.27	8.429	5.348	10.82	6.239	6.694	6.121
2015-13869	0.787307	Group3	5.792	5.931	5.491	5.614	5.238	4.969	5.638	5.853	0.6834	6.175	12.54	8.041	12.44	7.05	7.689	11.26	13.4	7.781	11.58	5.465	9.435	11.04
2015-14932	0.968217	Group3	6.864	6.279	6.649	9.725	6.904	6.625	8.463	1.694	1.694	6.998	9.381	11.57	13.14	6.367	8.625	10.35	10.83	6.476	12.85	6.694	7.353	8.677
2015-23702	0.977797	Group3	8.54	7.753	8.145	8.362	8.413	7.8	8.839	3.439	3.591	8.263	12.31	10.08	13.82	7.687	11.39	11.97	11.67	9.263	9.73	8.01	8.997	8.644
2015-25625	0.992223	Group3	6.562	8.699	6.187	7.942	6.141	5.491	8.15	2.509	1.772	9.22	12.1	12.19	11.82	10.87	6.867	10.18	10.36	6.176	6.772	6.094	6.571	7.327
2015-29586	0.912397	Group3	6.875	6.096	5.776	8.128	5.75	5.66	7.462	2.96	3.66	10.37	12.18	9.193	11.08	9.751	6.419	8.667	10.04	11.37	4.975	6.239	6.818	6.608
2015-30973	0.914689	Group3	6.737	6.589	6.542	8.423	6.532	5.995	7.444	2.995	1.879	7.133	12.95	9.496	11.83	10.52	7.201	9.319	12.14	8.052	9.34	6.879	9.312	8.237
2015-33700	0.927561	Group3	7.328	8.229	8.551	8.551	8.421	8.509	8.551	5.421	5.006	9.591	11.66	11.51	10.99	10.14	8.466	8.591	8.814	8.631	8.814	7.669	9.725	8.814
2015-38838	0.753553	Group3	6.566	6.365	5.743	6.884	6.073	6.13	6.608	6.012	2.458	7.807	11.72	7.412	12.77	7.435	8.513	12.03	12.71	9.463	10.59	5.628	10.35	11.02
2015-59550	0.735265	Group3	8.222	8.054	7.803	8.272	7.919	6.939	8.076	3.169	3.517	8.428	12.6	8.936	10.26	13.38	8.368	9.779	8.455	10.4	11.38	7.87	10.69	11.46
2015-64265	0.964724	Group3	6.882	7.276	7.461	7.816	6.551	7.255	9.973	7.7	3.767	10.81	11.42	10.2	12.33	11.41	7.521	6.882	6.91	9.498	6.777	5.972	7.574	7.345
2015-69290	0.889706	Group3	6.618	7.502	7.066	7.993	6.197	7.856	8.715	7.04	3.526	8.823	9.575	9.035	10.15	9.25	7.02	6.802	6.929	7.666	5.387	6.256	7.999	6.679
2016-12381	0.969344	Group3	5.304	7.91	6.708	8.137	5.19	3.644	6.852	3.088	2	6.248	11.44	11.11	11.69	7.135	6.585	8.106	6.852	7.687	8.452	5.808	7.922	7.05
2016-14411	0.942678	Group3	4.71	11.23	5.848	7.116	3.388	6.089	6.388	5.781	2.388	8.465	11.54	10.74	10.06	14.24	8.116	7.831	10.48	9.831	10.9	4.388	7.518	9.253
2016-17049	0.978428	Group3	5.173	5.758	6.343	8.697	5.981	5.981	6.173	0	3.173	6.495	11.81	11.01	12.33	9.901	7.928	9.583	10.69	5.173	11.3	4.758	7.173	8.303
2016-18796	0.908682	Group3	6.751	9.668	7.164	8.24	7.215	4.963	7.731	3.031	2.571	8.091	11.5	9.62	12.09	13.25	6.156	10.78	11.58	7.391	10.44	7.435	9.551	9.726
2016-28371	0.832723	Group3	6.484	6.885	7.565	8.993	5.484	6.556	7.706	3.006	5.106	6.658	6.427	8.878	6.738	7.164	7.307	10.42	6.658	7.987	3.521	6.706	7.019	9.43
2016-44577	0.835012	Group3	6.831	5.753	5.023	9.61	6.299	5.235	6.67	4.945	2.775	8.357	13.39	8.643	11.84	8.472	7.706	11.03	12.43	10.43	10.89	6.841	8.812	9.202
2016-64152	0.97775	Group3	7.554	6.412	6.22	7.825	6.936	5.448	7.096	3.949	0.6755	7.805	12.23	10.47	12.51	14.46	7.578	8.724	8.24	6.898	10.93	7.085	7.513	9.636
2016-69829	0.894481	Group3	10.5	10.48	9.445	9.383	9.924	8.913	10.89	5.891	5.698	9.989	13.84	11.32	13.38	10.74	9.35	10.22	13.8	10.06	11.91	9.845	10.54	10.67
2016-71666	0.977651	Group3	8.145	10.15	7.787	9.856	8.066	7.56	9.787	3.101	2.101	8.156	13.18	11.6	12.31	10.25	9.552	9.921	11.72	8.908	8.946	8.145	8.801	9.061
2016-78187	0.846642	Group3	9.581	8.946	8.527	8.527	9.143	7.958	9.081	4.589	0	8.43	12.87	9.626	12.8	8.252	8.662	11.14	13.06	9.488	10.75	8.662	10.55	10.98
2016-83921	0.927282	Group3	9.744	9.18	7.806	9.214	9.091	7.585	10.06	5.273	3.636	8.867	12.98	10.41	13.59	8.937	8.559	12.19	13.27	9.574	11.71	8.993	9.881	9.888
2017-01242	0.968332	Group3	5.052	4.4	4.293	7.669	3.762	5.499	6.052	4.177	3.914	7.019	12.72	12.03	10.13	10.13	7.85	6.547	6.019	6.177	11.07	4.177	8.341	7.941
2017-02750	0.898647	Group3	8.388	7.827	6.989	7.176	7.869	6.5	8.196	4.135	2.019	7.564	12.04	11.59	12.29	6.809	7.564	9.514	8.216	9.934	11.28	7.926	9.015	9.717
2017-06948	0.942555	Group3	7.216	6.799	7.423	8.421	6.968	6.001	7.038	3.327	2.842	6.906	12.56	9.31	10.47	10.1	7.301	9.091	11.38	8.642	5.535	7.79	7.673	7.125
2017-30417	0.827686	Group3	8.18	7.865	7.255	8.439	7.231	8.449	8.667	5.543	4.958	8.572	13.96	8.471	13.18	8.611	9.08	12.24	13.8	9.686	12.4	6.695	9.782	12.23
2017-32602	0.914435	Group3	7.831	8.791	7.394	7.817	7.687	6.881	8.389	3.195	2.78	8.053	13.47	9.846	13.46	10.72	7.125	9.399	13.9	7.996	11.7	7.687	8.471	9.192
2017-37734	0.996205	Group3	4.743	6.271	3.85	8.391	4.291	5.328	6.944	7.156	2.743	5.597	11.53	10.75	10.51	13.24	7.804	7.712	5.534	5.291	7.844	5.824	5.811	6.894
2017-42142	0.963196	Group3	5.495	11.19	5.281	6.733	5.347	5.197	6.728	3.553	2.36	6.138	12.44	9.357	11.43	14.12	5.979	7.608	11.99	6.405	9.779	5.239	6.893	8.2
2017-48219	0.996448	Group3	5.607	5.396	6.811	7.869	5.216	5.15	6.724	4.046	3.309	7.116	13.73	12.19	14.85	13.27	11.52	13.31	8.819	6.505	12.27	6.492	8.499	12.77
2017-51854	0.92769	Group3	8.621	8.357	7.948	8.417	8.161	7.269	9.034	3.961	3.569	8.157	12.99	9.428	13.02	14.5	7.241	10.15	12.57	8.583	11.76	8.123	8.879	9.761
2017-65750	0.987347	Group3	7.694	7.261	8.022	10.02	7.948	6.533	8.174	3.164	3.316	7.261	13.07	11.09	13.4	10.15	7.965	11.75	8.251	8.049	7.203	8.27	8.429	9.527
2017-66866	0.710978	Group3	8.265	7.853	8.129	7.944	8.271	6.903	8.229	3.785	3.325	7.713	11.35	8.364	12.14	8.663	8.65	11.08	12.45	9.494	11.42	8.618	9.879	11.24
2017-82860	0.947124	Group3	4.127	5.712	4.127	6.449	4.642	5.843	8.114	2.32	2.32	7.274	8.859	9.655	7.428	11.35	6.449	5.712	5.963	2.905	6.529	4.905	6.992	6.568
2017-84416	0.950929	Group3	5.081	5.281	6.331	6.723	4.754	5.119	6.932	4.119	3.456	7.306	13.13	10.5	13.06	13.32	6.298	11.07	9.672	7.522	11.33	6.138	7.656	12.4
2018-17128	0.996149	Group3	4.519	6.306	7.594	8.151	3.094	3.704	5.981	4.385	1.654	6.818	12.39	11.55	11.3	8.504	9.016	7.308	4.574	4.354	9.288	4.446	7.293	5.765
2018-34868	0.987383	Group3	5.161	4.955	4.062	9.05	3.202	4.354	6.208	5.188	2.147	7.737	12.09	9.64	12.97	9.648	9.205	10.08	10.67	5.607	10.41	5.378	6.105	9.892

## Sheet: incorrectly predicted SHH image
	representative images of 9 cases of SHH that are incorrectly predicted
